# Supplementary material
Source: publisher figshare collection journal article supplement (https://future-science-group.figshare.com/ndownloader/files/30958600)
Supplement: Supplementary file 1 [file 30958600]

## Sheet: tableS1
Supplement Table 1. Comparison of characteristics between included subjects and whole cohort
variable	analytical subjects	whole cohort	F value/t value	p-value
Gender, n (%)
Male	92 (55.8)	288 (55.5)	0.008	0.927
Female	73 (44.2)	231 (44.5)
Birth Weight, (mean ± SD, gram)a	3403.6 ± 529.5	3361.3 ± 627.0	307.97	0.422
Gestational age, (mean ± SD, week)1	39.4 ± 1.9	38.6 ± 9.9	1.65	0.099
MSDP, n(%)
No	82 (50.9)	305 (59.9)	4.052	0.044
Yes	79 (49.1)	204 (40.1)
GMSDP, n(%)
No	98 (60.9)	1137 (74.8)	14.038	<0.001
Yes	63 (39.1)	387 (25.2)
Exposure to passive Smoking, n (%)
No	59 (36.9)	233 (45.2)	3.482	0.062
Yes	101 (63.1)	282 (54.8)
Socioeconomic Status, n (%)
1 (lower)	29 (18.2)	77 (19.3)	3.822	0.43
2	50 (31.5)	97 (24.2)
3	36 (22.6)	114 (28.5)
4 (higher)	44 (27.7)	112 (28.0)
GMSDP = Grandmaternal smoking during pregnancy, MSDP = Maternal smoking during pregnancy
a group differences was determined by t test

## Sheet: tableS2
Supplement Table 2. Association between DNAm of GMSDP-associated CpG sites and annotated gene expression level (n=87)
CpG sites	Gene Symbol	Probe Name	Estimate	Chi-square	p-value
cg01718065	CD33	A_23_P331748	-0.1377	0.46	0.4973
cg01718065	CEACAM18	A_33_P3249818	-0.186	0.65	0.4209
cg01718065	CLDND2	A_23_P374902	0.2137	0.62	0.4313
cg01718065	CTU1	A_33_P3395971	0.0052	0	0.9683
cg01718065	ETFB	A_23_P107653	0.0063	0	0.9568
cg01718065	IGLON5	A_24_P271149	-0.0616	0.12	0.7264
cg01718065	KLK11	A_23_P101505	-0.0734	0.13	0.7234
cg01718065	KLK12	A_23_P500010	0.2114	0.6	0.4404
cg01718065	KLK13	A_24_P416645	-0.0989	0.07	0.7951
cg01718065	KLK14	A_33_P3417640	-0.0518	0.04	0.8327
cg01718065	LIM2	A_23_P130435	0.0957	0.31	0.5804
cg01718065	LOC100129083	A_21_P0000589	-0.0475	0.07	0.798
cg01718065	NKG7	A_23_P119042	0.1124	0.69	0.4056
cg01718065	SIGLEC10	A_23_P208182	0.0103	0	0.9652
cg01718065	SIGLEC17P	A_33_P3309621	-0.2167	1.26	0.2612
cg01718065	SIGLEC6	A_23_P4592	-0.1325	0.69	0.4075
cg01718065	SIGLEC7	A_23_P38784	0.0888	0.51	0.4756
cg01718065	SIGLEC8	A_24_P40001	0.0138	0	0.9584
cg01718065	SIGLEC9	A_24_P125561	0.1123	1.03	0.3095
cg01718065	SIGLECL1	A_32_P80816	-0.2984	1.72	0.1902
cg01718065	SIGLECL1	A_32_P80816	-0.2984	1.72	0.1902
cg01718065	VSIG10L	A_23_P101246	-0.1209	1.83	0.1756
cg02296145	EME2	A_33_P3297005	-0.0562	0.14	0.7057
cg02296145	EME2	A_23_P366125	-0.1186	0.48	0.4884
cg02296145	FAHD1	A_23_P118300	-0.1551	3.31	0.0689
cg02296145	FAHD1	A_33_P3326617	0.0106	0.01	0.9419
cg02296145	GFER	A_24_P31003	0.2907	4.22	0.0399
cg02296145	HAGH	A_33_P3333488	-0.1406	2.17	0.141
cg02296145	HS3ST6	A_33_P3302185	-0.2992	2.13	0.1443
cg02296145	IFT140	A_23_P140725	0.2761	4.8	0.0285
cg02296145	IGFALS	A_23_P14892	-0.2159	2	0.1573
cg02296145	LINC00254	A_21_P0000614	-0.2398	0.95	0.3306
cg02296145	MAPK8IP3	A_33_P3279841	0.1143	1.89	0.1691
cg02296145	MEIOB	A_32_P75902	-0.1208	0.39	0.5303
cg02296145	MRPS34	A_33_P3422931	0.0178	0.04	0.8461
cg02296145	MSRB1	A_23_P129486	-0.0004	0	0.9977
cg02296145	NDUFB10	A_23_P118105	-0.0142	0.03	0.8621
cg02296145	NME3	A_23_P152115	0.0169	0.04	0.843
cg02296145	NOXO1	A_33_P3333800	-0.1483	0.63	0.4287
cg02296145	NPW	A_23_P352799	-0.1597	0.48	0.4868
cg02296145	NTHL1	A_23_P88904	0.0901	0.75	0.3876
cg02296145	NUBP2	A_23_P49082	-0.1068	0.61	0.4356
cg02296145	RNF151	A_32_P179837	-0.0148	0.01	0.9078
cg02296145	RPL3L	A_23_P118095	-0.051	0.05	0.8192
cg02296145	RPS2	A_21_P0010964	-0.0286	0.15	0.6958
cg02296145	RPS2	A_24_P135902	0.029	0.08	0.7807
cg02296145	RPS2	A_33_P3335124	0.125	1.24	0.2651
cg02296145	RPS2	A_23_P106708	-0.0446	0.23	0.6305
cg02296145	RPS2	A_21_P0011866	-0.0169	0.05	0.817
cg02296145	SLC9A3R2	A_24_P364838	-0.0322	0.35	0.5555
cg02296145	SNHG9	A_33_P3280965	-0.0994	0.67	0.4116
cg02296145	SNORA10	A_33_P3563369	0.1065	0.32	0.5688
cg02296145	SNORA10	A_21_P0000237	-0.1911	1.91	0.1672
cg02296145	SNORA64	A_21_P0000236	0.0786	0.37	0.5449
cg02296145	SNORA78	A_33_P3604591	-0.0266	0.05	0.8312
cg02296145	SPSB3	A_23_P330537	0.0066	0	0.9449
cg02296145	SPSB3	A_33_P3235716	-0.0645	0.76	0.3833
cg02296145	SYNGR3	A_23_P88909	-0.0338	0.16	0.6862
cg02296145	SYNGR3	A_33_P3381899	0.0159	0.02	0.8878
cg02296145	TBL3	A_33_P3577120	0.1379	0.4	0.5289
cg02296145	TBL3	A_23_P106720	0.016	0.01	0.9253
cg02296145	TBL3	A_33_P3375398	0.098	0.14	0.7099
cg02296145	TMEM204	A_33_P3282556	0.0331	0.07	0.7893
cg02296145	ZNF598	A_23_P100292	0.0722	0.92	0.3375
cg02296145	ZNF598	A_23_P407684	0.1274	2.03	0.1538
cg02399044	CACNA1C	A_23_P373031	0.1951	0.47	0.4912
cg02399044	CACNA1C	A_33_P3297580	0.051	0.05	0.8292
cg02399044	CACNA1C	A_33_P3249394	0.1042	0.15	0.7025
cg02399044	CACNA1C	A_33_P3825869	-0.1406	0.37	0.5428
cg02473254	ARHGEF10	A_33_P3351351	1.1436	2.16	0.1416
cg02473254	ARHGEF10	A_33_P3351356	0.8084	1.95	0.1621
cg02473254	ARHGEF10	A_23_P216282	0.1701	0.15	0.6977
cg02473254	ARHGEF10	A_33_P3351346	0.8801	2.9	0.0885
cg02473254	KBTBD11	A_23_P94319	-0.2349	0.34	0.5623
cg02473254	MYOM2	A_23_P258912	0.0533	0	0.9582
cg02615735	ABHD16A	A_23_P156697	-0.069	0.08	0.7746
cg02615735	AIF1	A_23_P214627	0.1907	0.97	0.3252
cg02615735	AIF1	A_33_P3213288	-0.2383	0.4	0.5259
cg02615735	APOM	A_24_P89426	-0.0503	0.14	0.7065
cg02615735	APOM	A_23_P42265	-0.0706	0.24	0.6254
cg02615735	ATP6V1G2	A_23_P500410	-0.0617	0.04	0.847
cg02615735	BAG6	A_23_P111141	0.0445	0.09	0.7645
cg02615735	BAG6	A_33_P3275668	-0.1082	0.29	0.5882
cg02615735	C2	A_33_P3404601	0.0077	0	0.9787
cg02615735	C2	A_32_P162187	-0.077	0.13	0.721
cg02615735	C6orf47	A_23_P122532	-0.0701	0.15	0.7017
cg02615735	CLIC1	A_23_P30884	0.0443	0.05	0.8278
cg02615735	CSNK2B	A_24_P97931	-0.0581	0.23	0.629
cg02615735	CSNK2B	A_33_P3318027	-0.073	0.46	0.499
cg02615735	DDAH2	A_23_P19482	-0.1626	0.62	0.4296
cg02615735	DDX39B	A_24_P904903	-0.0101	0	0.9503
cg02615735	EHMT2	A_23_P214638	-0.2048	2.14	0.1433
cg02615735	GPANK1	A_23_P133923	0.0092	0	0.9575
cg02615735	HCG26	A_32_P220770	0.0552	0.03	0.8587
cg02615735	HCP5	A_24_P17870	-0.1531	0.39	0.5312
cg02615735	HSPA1A	A_23_P111132	-0.0718	0.08	0.7748
cg02615735	HSPA1B	A_33_P3415430	-0.5629	3.02	0.082
cg02615735	HSPA1L	A_23_P70547	0.1357	0.45	0.5005
cg02615735	LSM2	A_23_P59153	0.0991	0.32	0.571
cg02615735	LSM2	A_33_P3261625	0.1044	0.37	0.541
cg02615735	LST1	A_24_P103469	0.2442	0.9	0.3417
cg02615735	LTA	A_23_P156683	0.3388	0.87	0.3506
cg02615735	LTB	A_33_P3248265	0.0203	0.01	0.9067
cg02615735	LY6G5B	A_23_P59130	-0.0324	0.01	0.9086
cg02615735	LY6G5C	A_24_P7584	0.1825	0.81	0.3692
cg02615735	LY6G6C	A_23_P8083	0.1121	0.09	0.7677
cg02615735	LY6G6D	A_33_P3275722	0.1283	0.23	0.6323
cg02615735	LY6G6E	A_33_P3410232	0.0184	0	0.95
cg02615735	LY6G6E	A_33_P3277097	-0.011	0	0.9653
cg02615735	LY6G6F	A_33_P3214334	0.8786	7.2	0.0073
cg02615735	MCCD1	A_23_P133904	0.0378	0.02	0.8939
cg02615735	MICB	A_24_P169688	-0.349	2.8	0.0942
cg02615735	MICB	A_23_P387471	-0.1031	0.2	0.6542
cg02615735	MSH5	A_33_P3346222	-0.1212	0.88	0.3484
cg02615735	MSH5	A_33_P3233081	0.0661	0.1	0.752
cg02615735	NCR3	A_33_P3344423	-0.0435	0.05	0.8272
cg02615735	NCR3	A_23_P251881	-0.1411	0.3	0.5819
cg02615735	NEU1	A_24_P394533	-0.0081	0	0.959
cg02615735	NFKBIL1	A_33_P3283971	-0.0127	0	0.9535
cg02615735	NFKBIL1	A_33_P3386506	-0.103	0.31	0.5802
cg02615735	PRRC2A	A_24_P641130	0.1326	0.24	0.6269
cg02615735	SAPCD1	A_24_P3804	0.1206	0.39	0.5333
cg02615735	SLC44A4	A_24_P684183	0.6606	1.82	0.1778
cg02615735	SNORA38	A_21_P0000326	0.1883	1.07	0.302
cg02615735	SNORD117	A_21_P0000398	0.1752	0.3	0.5813
cg02615735	SNORD48	A_21_P0000286	0.1848	0.63	0.4286
cg02615735	SNORD52	A_21_P0000284	-0.0134	0	0.9592
cg02615735	SNORD84	A_21_P0000383	0.3406	1.29	0.2557
cg02615735	TNF	A_23_P376488	0.223	0.95	0.3298
cg02615735	VWA7	A_23_P42288	0.0727	0.09	0.7645
cg02615735	ZBTB12	A_23_P111155	-0.1282	0.17	0.6803
cg03807330	ACER3	A_23_P203665	-0.062	0.02	0.8916
cg03807330	GUCY2EP	A_33_P3371180	0.1097	0.08	0.7802
cg03807330	GUCY2EP	A_33_P3300800	0.3584	0.29	0.5887
cg03807330	LRRC32	A_24_P389916	0.4696	1.67	0.1956
cg03807330	TSKU	A_23_P162142	-0.1914	0.19	0.6669
cg08859138	ANKRD31	A_21_P0012913	0.102	0.3	0.5829
cg08859138	ANKRD31	A_21_P0012912	0.103	0.31	0.5748
cg08859138	ANKRD31	A_24_P357647	0.2291	1.87	0.1718
cg08859138	ANKRD31	A_33_P3362826	0.0838	0.38	0.5351
cg08859138	GCNT4	A_23_P122077	0.1337	1.65	0.1995
cg08859138	HMGCR	A_23_P30495	-0.04	0.22	0.6419
cg11596397	DGAT2	A_23_P53198	0.6297	2.27	0.1318
cg11596397	MAP6	A_23_P47728	-0.0978	0.04	0.8358
cg11596397	MAP6	A_33_P3276997	0.4284	1.1	0.2945
cg11596397	MOGAT2	A_33_P3353866	0.0163	0	0.9729
cg11596397	SERPINH1	A_33_P3269203	-0.137	0.23	0.6345
cg11596397	UVRAG	A_33_P3260722	0.0582	0.05	0.8303
cg12732436	ADNP2	A_23_P164468	-0.0846	0.21	0.6461
cg12732436	CTDP1	A_23_P101111	0.0067	0	0.9574
cg12732436	CTDP1	A_33_P3401841	0.081	0.52	0.4699
cg12732436	CTDP1	A_23_P89727	-0.0289	0.03	0.868
cg12732436	HSBP1L1	A_32_P46981	-0.1865	0.6	0.4388
cg12732436	KCNG2	A_23_P61171	-0.2556	0.89	0.3465
cg12732436	PARD6G	A_24_P74070	-0.2244	0.9	0.3434
cg12732436	RBFA	A_23_P153086	-0.1427	1.96	0.1616
cg12732436	TXNL4A	A_24_P116871	0.0658	0.23	0.6287
cg12732436	TXNL4A	A_23_P130304	-0.0873	0.4	0.5261
cg12732436	PARD6G	AS1_A_33	-0.3559	0.92	0.3376
cg12732436	PARD6G	AS1_A_33	-0.2313	0.37	0.5435
cg12799739	ARL6	A_24_P354337	-0.3339	0.27	0.6056
cg12799739	EPHA6	A_33_P3408782	-0.0801	0.01	0.9073
cg12799739	EPHA6	A_23_P18342	-0.3291	0.31	0.5753
cg12799739	GABRR3	A_23_P69020	-0.4356	0.51	0.4734
cg12799739	OR5AC2	A_33_P3359483	-0.5953	0.99	0.3192
cg13749070	IGF1R	A_23_P417282	-0.203	0.97	0.3237
cg13749070	PGPEP1L	A_32_P3534	-0.0569	0.06	0.8054
cg13749070	SYNM	A_24_P104407	0.3832	1.39	0.2383
cg13749070	TTC23	A_24_P65121	0.0237	0.01	0.9169
cg13749070	TTC23	A_23_P140563	-0.0677	0.14	0.7129
cg14284055	CNR2	A_23_P310931	0.2346	1.76	0.185
cg14284055	FUCA1	A_23_P11543	0.0821	0.1	0.7544
cg14284055	GRHL3	A_23_P52067	-0.2692	0.94	0.3323
cg14284055	GRHL3	A_33_P3266132	-0.1014	0.1	0.757
cg14284055	IFNLR1	A_33_P3268612	-0.3963	1.09	0.2967
cg14284055	IFNLR1	A_24_P19677	-0.4101	1.47	0.2251
cg14284055	IFNLR1	A_23_P74112	0.1398	0.23	0.6352
cg14284055	IL22RA1	A_23_P62607	0.1531	0.34	0.5582
cg14284055	MYOM3	A_23_P51213	0.265	0.57	0.4519
cg14284055	PNRC2	A_33_P3323742	0.1012	0.41	0.5196
cg14284055	PNRC2	A_23_P103201	-0.0006	0	0.9978
cg14284055	SRSF10	A_33_P3303215	0.2592	3.49	0.0618
cg14284055	SRSF10	A_23_P311201	-0.4087	0.79	0.3748
cg14284055	SRSF10	A_32_P45493	0.1849	0.63	0.428
cg14284055	SRSF10	A_23_P352291	0.1221	0.19	0.6667
cg14284055	STPG1	A_33_P3402103	-0.3259	2.02	0.1554
cg14284055	STPG1	A_24_P133162	0.0742	0.18	0.6743
cg15497724	CD33	A_21_P0000094	0.7293	6.11	0.0134
cg15497724	CEACAM18	A_33_P3249818	0.2451	0.84	0.3597
cg15497724	CLDND2	A_23_P374902	0.4049	1.66	0.1975
cg15497724	CTU1	A_33_P3395976	-0.0872	0.33	0.567
cg15497724	ETFB	A_23_P107653	-0.1297	0.94	0.3318
cg15497724	IGLON5	A_24_P271149	0.1612	0.63	0.4259
cg15497724	KLK11	A_23_P101505	-0.0944	0.15	0.6945
cg15497724	KLK12	A_23_P500010	0.1029	0.1	0.7469
cg15497724	KLK13	A_33_P3251065	-0.2657	0.82	0.3643
cg15497724	KLK13	A_24_P333697	0.3587	1.31	0.2517
cg15497724	KLK14	A_33_P3417640	-0.0716	0.06	0.8009
cg15497724	LIM2	A_23_P130435	-0.0481	0.06	0.811
cg15497724	LOC100129083	A_21_P0000589	0.0766	0.13	0.722
cg15497724	NKG7	A_23_P119042	0.076	0.23	0.6286
cg15497724	SIGLEC10	A_23_P208182	-0.2953	1.18	0.2783
cg15497724	SIGLEC12	A_23_P164596	0.5526	3.9	0.0482
cg15497724	SIGLEC17P	A_32_P128258	0.0574	0.05	0.8201
cg15497724	SIGLEC6	A_23_P4592	-0.1806	0.95	0.3293
cg15497724	SIGLEC7	A_23_P38784	0.0888	0.39	0.5324
cg15497724	SIGLEC8	A_24_P40001	0.0474	0.02	0.8753
cg15497724	SIGLEC9	A_24_P125561	0.2304	3.32	0.0685
cg15497724	SIGLECL1	A_32_P80816	-0.3734	1.97	0.1607
cg15497724	VSIG10L	A_33_P3395848	-0.1067	0.1	0.7567
cg15517847	FOXO1	A_24_P22079	-0.2164	2.62	0.1056
cg15517847	MRPS31	A_23_P162807	-0.1855	1.61	0.2043
cg15517847	SLC25A15	A_21_P0012276	0.1111	0.16	0.6869
cg15517847	SLC25A15	A_33_P3840512	0.0425	0.12	0.7298
cg15517847	SUGT1P3	A_24_P135255	0.1897	0.39	0.534
cg20056908	ATOH8	A_33_P3392740	0.8842	2.33	0.1265
cg20056908	ATOH8	A_23_P142878	0.1177	0.06	0.8019
cg20056908	C2orf68	A_32_P36046	-0.4651	1.71	0.1908
cg20056908	C2orf68	A_33_P3404959	-0.1371	0.22	0.6364
cg20056908	CAPG	A_33_P3389634	-0.2828	0.59	0.443
cg20056908	CAPG	A_33_P3305758	-0.6519	2.67	0.1025
cg20056908	ELMOD3	A_23_P154256	-0.1872	0.64	0.4233
cg20056908	ELMOD3	A_33_P3235204	1.3558	7.07	0.0078
cg20056908	ELMOD3	A_33_P3297305	-0.5987	2.53	0.1117
cg20056908	ELMOD3	A_33_P3297302	0.1875	0.86	0.3551
cg20056908	GGCX	A_32_P181103	-0.1421	0.1	0.7477
cg20056908	GNLY	A_23_P209954	0.0954	0.03	0.8701
cg20056908	GNLY	A_33_P3353921	0.1772	0.14	0.712
cg20056908	MAT2A	A_33_P3403044	0.3066	0.8	0.3706
cg20056908	MAT2A	A_23_P401568	-0.2284	0.69	0.4046
cg20056908	RETSAT	A_23_P209944	0.0056	0	0.9896
cg20056908	RETSAT	A_33_P3273424	1.1556	3.22	0.0728
cg20056908	RNF181	A_23_P108708	0.0095	0	0.9653
cg20056908	SFTPB	A_33_P3275878	0.9599	3.21	0.073
cg20056908	SFTPB	A_33_P3275873	-0.0735	0.01	0.9142
cg20056908	SH2D6	A_33_P3357199	1.1626	3.81	0.051
cg20056908	TMEM150A	A_24_P291401	0.2263	1.08	0.2979
cg20056908	USP39	A_32_P101301	-0.1167	0.37	0.5406
cg20056908	USP39	A_33_P3399840	-0.3287	2.72	0.0991
cg20056908	VAMP5	A_23_P39840	0.3756	1.7	0.1922
cg20056908	VAMP8	A_23_P28434	0.0364	0.01	0.9199
cg23072559	BRSK1	A_23_P89973	-0.6793	1.11	0.2919
cg23072559	COX6B2	A_33_P3378284	-0.0729	0.03	0.8594
cg23072559	COX6B2	A_23_P78571	0.1342	0.05	0.8201
cg23072559	EPN1	A_33_P3292699	0.0818	0.04	0.8448
cg23072559	EPN1	A_33_P3370284	-0.1435	0.34	0.5602
cg23072559	FAM71E2	A_33_P3319572	0.3513	1.22	0.2689
cg23072559	FAM71E2	A_24_P349807	1.2545	3.17	0.0748
cg23072559	FIZ1	A_23_P107855	-0.1124	0.24	0.6263
cg23072559	HSPBP1	A_23_P10685	0.0493	0.02	0.8747
cg23072559	IL11	A_33_P3243887	0.1634	0.1	0.7555
cg23072559	ISOC2	A_24_P99795	-0.4119	1.5	0.2207
cg23072559	NAT14	A_23_P50389	0.4553	0.56	0.4559
cg23072559	PPP6R1	A_23_P119448	-1.5972	3.87	0.0491
cg23072559	PTPRH	A_23_P101642	-0.36	0.45	0.5046
cg23072559	RPL28	A_33_P3299319	0.3409	0.67	0.4143
cg23072559	RPL28	A_23_P208358	0.1955	0.48	0.4871
cg23072559	RPL28	A_33_P3299314	0.4217	1.7	0.1918
cg23072559	RPL28	A_33_P3299309	-0.509	0.96	0.327
cg23072559	SBK2	A_23_P142031	-0.8671	0.66	0.4177
cg23072559	SHISA7	A_24_P161581	-0.1326	0.05	0.8225
cg23072559	SHISA7	A_23_P390443	-0.1891	0.05	0.8211
cg23072559	SSC5D	A_21_P0000127	-1.2632	5.8	0.016
cg23072559	SSC5D	A_33_P3303542	-0.1864	0.14	0.7063
cg23072559	SSC5D	A_33_P3358898	-0.5573	1.24	0.266
cg23072559	TMEM150B	A_33_P3401008	0.0922	0.04	0.8432
cg23072559	TMEM190	A_23_P107775	0.8972	2.73	0.0987
cg23072559	TMEM86B	A_24_P121956	-0.5345	2.76	0.0965
cg23072559	U2AF2	A_33_P3302796	0.0086	0	0.9739
cg23072559	UBE2S	A_32_P171328	-0.4665	1.61	0.2052
cg23072559	ZNF524	A_23_P376735	0.1555	0.15	0.702
cg23072559	ZNF579	A_33_P3403778	-0.0214	0.01	0.908
cg23072559	ZNF580	A_23_P164797	-0.0521	0.03	0.8545
cg23072559	ZNF581	A_23_P4798	0.2519	0.39	0.53
cg23072559	ZNF581	A_23_P4798	0.2519	0.39	0.53
cg23072559	ZNF628	A_32_P409222	0.2331	1.42	0.2327
cg23072559	ZNF784	A_33_P3230399	-0.423	1.11	0.2923
cg23072559	ZNF865	A_33_P3210160	-0.4787	1.91	0.167
cg23072559	ZNF865	A_33_P3412184	0.4029	0.58	0.4447
cg23072559	ZNF865	A_21_P0011715	-0.2696	0.46	0.4995
cg23243463	CELF4	A_32_P183367	0.1034	0.55	0.4574
cg23243463	CELF4	A_33_P3535972	0.1336	0.5	0.4802
cg23350744	PPIC	A_23_P422724	0.1122	0.22	0.6418
cg23350744	PRDM6	A_32_P222684	0.0601	0.08	0.7816
cg23350744	SNX24	A_33_P3702364	-0.4031	5.52	0.0188
cg23670101	ALOX5	A_23_P104464	-0.0862	0.04	0.8416
cg23670101	ALOX5	A_33_P3356007	-0.4848	0.62	0.4311
cg23670101	ZFAND4	A_23_P1170	-0.0975	0.06	0.8085
cg23670101	ZFAND4	A_33_P3301316	-0.1458	0.13	0.714
cg24735611	CHD1L	A_23_P45831	1.0394	8.14	0.0043
cg24735611	CHD1L	A_33_P3315258	-1.4019	4.04	0.0446
cg24735611	FMO5	A_33_P3376214	1.2674	5.46	0.0194
cg24735611	FMO5	A_23_P233	0.6513	1.32	0.2512
cg24735611	PRKAB2	A_24_P105564	0.9922	3.51	0.061
cg25256538	C6orf99	A_33_P3312119	0.0034	0	0.9921
cg25256538	EZR	A_23_P19590	-0.4213	2.89	0.0893
cg25256538	FNDC1	A_23_P407840	-0.0378	0.01	0.9394
cg25256538	FNDC1	A_33_P3290354	-0.1957	0.36	0.5468
cg25256538	OSTCP1	A_24_P317450	-0.0843	0.12	0.7303
cg25256538	RSPH3	A_23_P59397	-0.1112	0.68	0.4096
cg25256538	SYTL3	A_24_P291826	0.3211	1.22	0.2703
cg25256538	TAGAP	A_24_P354724	-0.059	0.05	0.8239
cg25256538	TAGAP	A_23_P339588	0.1316	0.31	0.5802
cg26961622	LAPTM4A	A_23_P90659	-0.2324	0.42	0.5194
cg26961622	MATN3	A_33_P3420466	0.8608	1.03	0.3106
cg26961622	MATN3	A_23_P102058	-0.139	0.06	0.8035
cg26961622	PUM2	A_24_P71439	-0.0999	0.07	0.7914
cg26961622	RHOB	A_33_P3308446	-0.6543	1	0.3174
cg26961622	RHOB	A_33_P3398862	-0.3003	0.43	0.5117
cg26961622	SDC1	A_23_P16944	-0.5538	1.96	0.1611
cg26961622	WDR35	A_33_P3335865	-0.8088	1.81	0.179
cg27106230	DOCK9	A_33_P3410284	-0.0315	0.02	0.8916
cg27106230	DOCK9	A_33_P3259817	-0.0768	0.07	0.7854
cg27106230	DOCK9	A_33_P3259821	0.0776	0.13	0.7159
cg27106230	DOCK9	A_33_P3410279	-0.0174	0.01	0.9385
cg27106230	DOCK9	A_23_P162766	-0.0078	0	0.9746
cg27106230	DOCK9	A_21_P0012831	-0.3665	0.91	0.3391
cg27106230	FARP1	A_33_P3388331	-0.6988	3.4	0.0651
cg27106230	FARP1	A_23_P204998	0.3863	0.77	0.3813
cg27106230	FARP1	A_33_P3238856	-0.5698	5.55	0.0185
cg27106230	SLC15A1	A_24_P8165	-0.4994	3.28	0.0701
cg27106230	SLC15A1	A_33_P3373273	-0.7467	6.58	0.0103
cg27106230	STK24	A_23_P253177	0.1034	0.29	0.5884
cg27106230	STK24	A_24_P73389	-0.083	0.15	0.6949

## Sheet: tableS3
Supplement Table 3. CpG sites located at AHRR, MYO1G, and GFI1 significantly associated with grandmaternal smoking and maternal smoking during pregnancy
CpG site	Unadjusted model effect size	Gene Annotation	Position	Relation to annotated gene	Relation to CpG island	P	FDR
cg04180046	0.379	MYO1G	chr7:45002736	Body	Island	<0.001	<0.001
cg05575921	-0.587	AHRR	chr5:373378	Body	N_Shore	<0.001	<0.001
cg09662411	-0.48	GFI1	chr1:92946132	Body	Island	0.001	0.004
cg09935388	-0.539	GFI1	chr1:92947588	Body	Island	<0.001	0.003
cg10399789	-0.321	GFI1	chr1:92945668	Body	N_Shore	0.007	0.009
cg12803068	0.669	MYO1G	chr7:45002919	Body	S_Shore	<0.001	0.001
cg12876356	-0.637	GFI1	chr1:92946825	Body	Island	<0.001	0.004
cg14179389	-0.565	GFI1	chr1:92947961	Body	Island	<0.001	0.004
cg18146737	-0.994	GFI1	chr1:92946700	Body	Island	<0.001	0.003
cg18316974	-0.918	GFI1	chr1:92947035	Body	Island	<0.001	0.004
cg19089201	0.421	MYO1G	chr7:45002287	3'UTR	Island	0.001	0.004
cg26529655	-0.115	AHRR	chr5:424371	Body	S_Shelf	0.003	0.007
Chr: Chromosome; FDR: False Discovery Rate; RefGene Group = Gene region feature category describing the CpG position;
Effect size = difference in DNAm (cell-proportion adjusted beta-value) between grandchildren among those who were exposed to both GMSDP and MSDP and those who were unexposed to neither GMSDP nor MSDP.
